# Supplementary material for: Glycophagy is involved in cardiac glycogen regulation in response to exercise
Source: PubMed Central journal article supplement — Curr Res Physiol. 2024 Aug 23;7:100131. doi: 10.1016/j.crphys.2024.100131 (PMC11402405; doi:10.1016/j.crphys.2024.100131), 2024-08-23
Supplement: mmc1.pdf [file mmc1.pdf]

## Glycogen Synthase

### Membrane 1

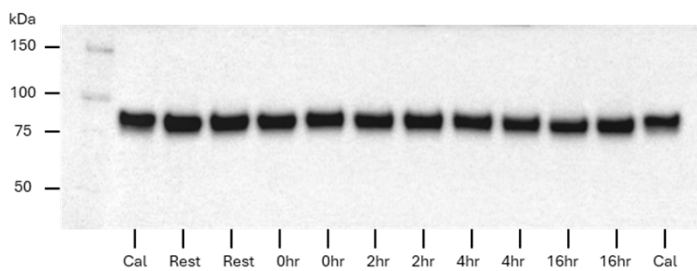

### Membrane 3

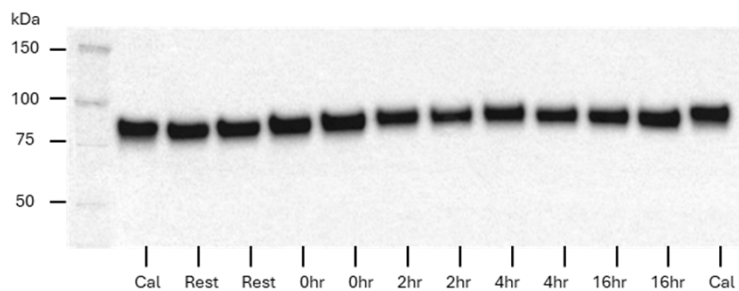

### Membrane 2

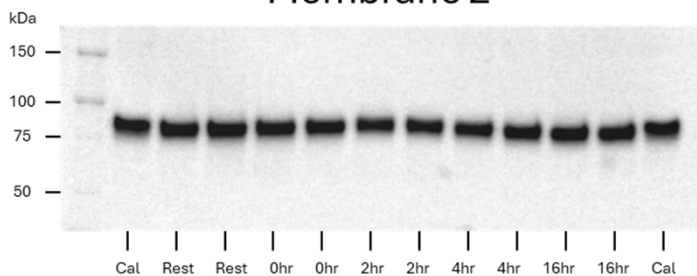

### Membrane 4

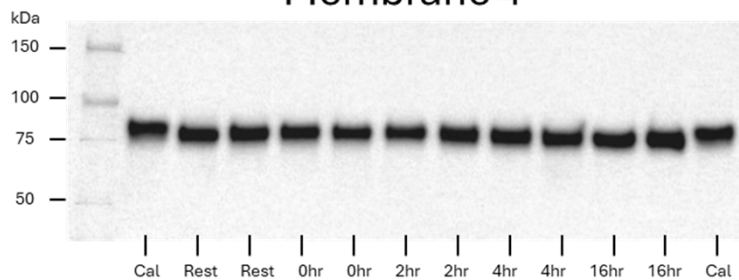

## Phosphorylated (Ser641) Glycogen Synthase

### Membrane 1

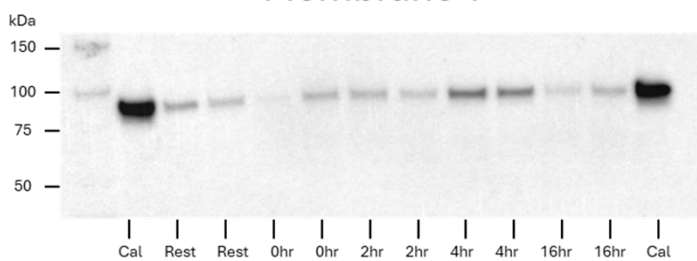

### Membrane 2

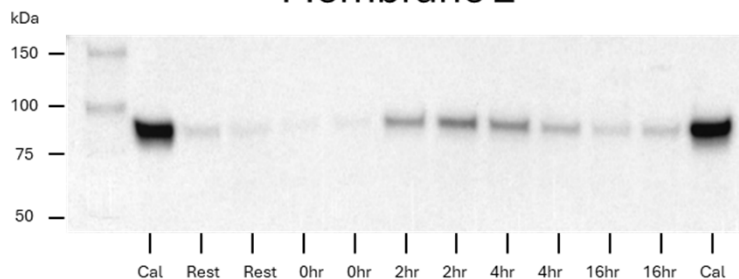

### Membrane 3

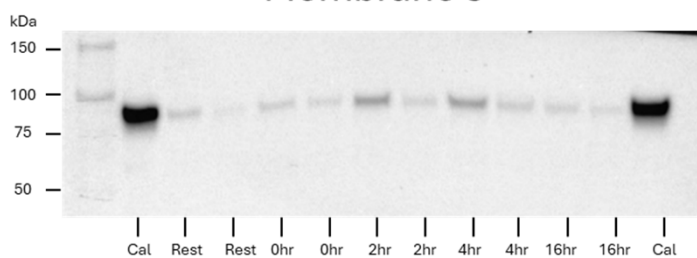

### Membrane 4

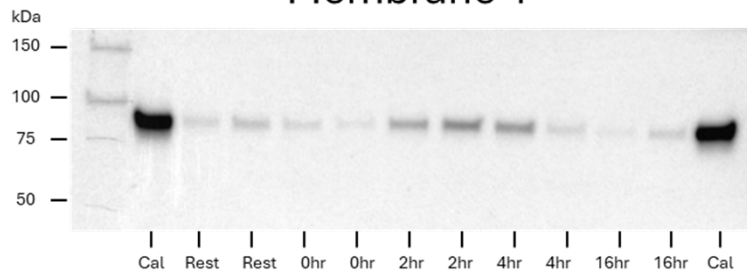

**Supplementary figure S1. Glycogen Synthase Immunoblots.** Cal, calibrator sample loaded on to each gel. Related to Figure 1.

## Glycogen Phosphorylase

### Membrane 1

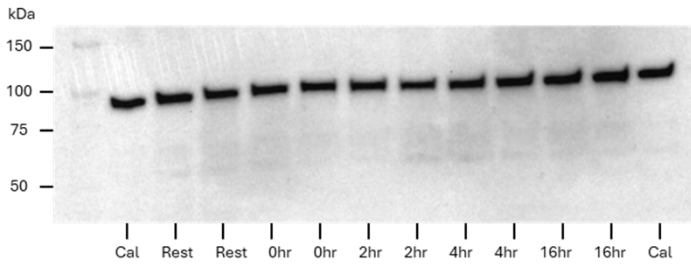

### Membrane 3

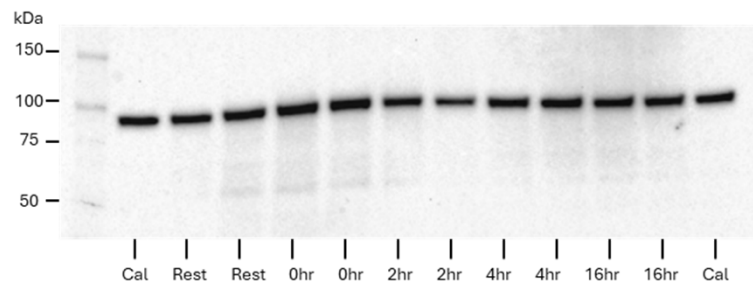

### Membrane 2

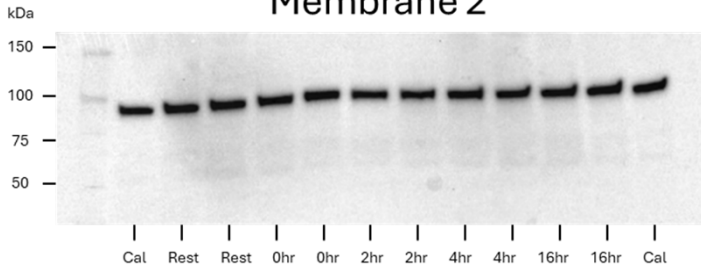

### Membrane 4

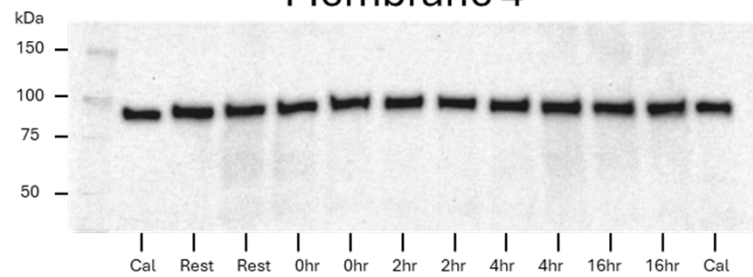

## Phosphorylated (Ser14) Glycogen Phosphorylase

### Membrane 1

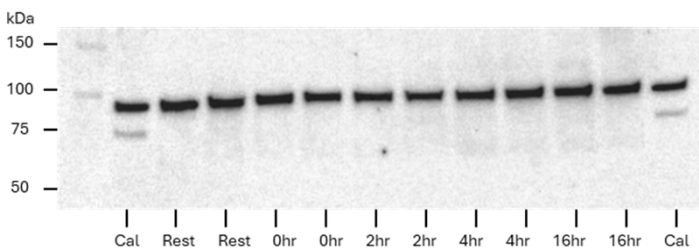

### Membrane 3

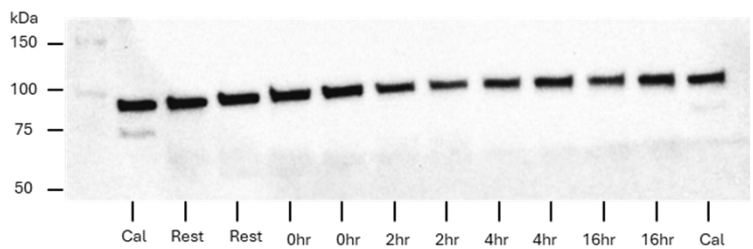

### Membrane 2

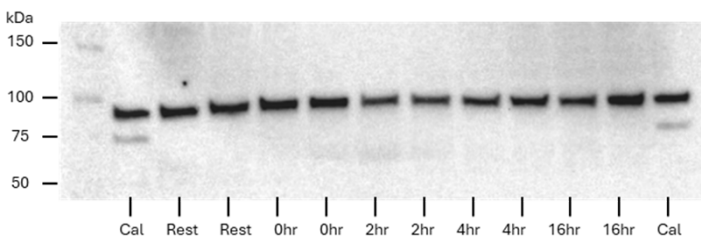

### Membrane 4

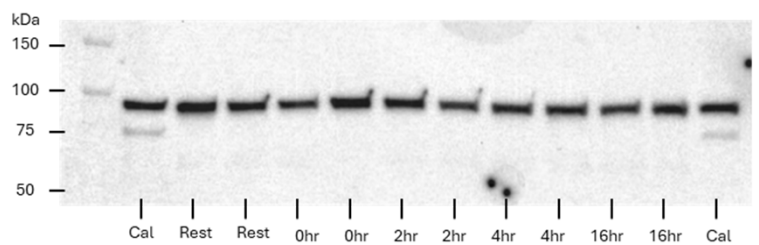

**Supplementary figure S2. Glycogen Phosphorylase Immunoblots.** Cal, calibrator sample loaded on to each gel. Related to Figure 1.

## STBD1

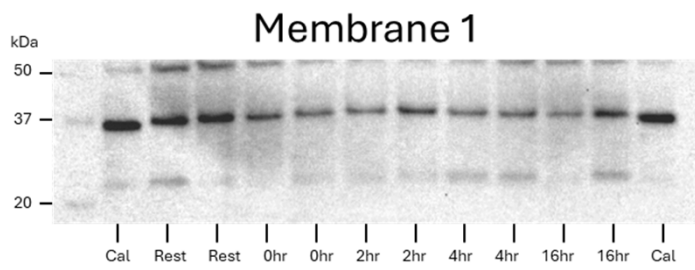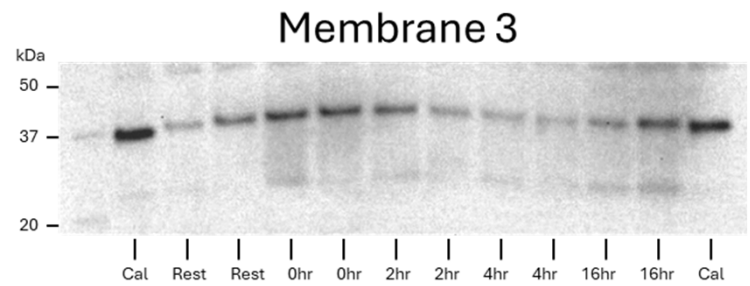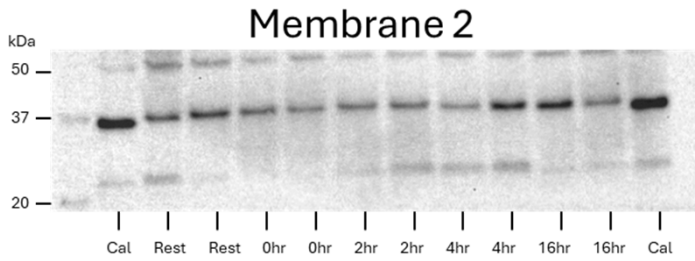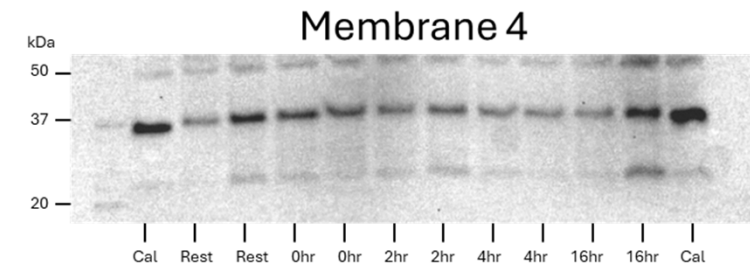

## GAA

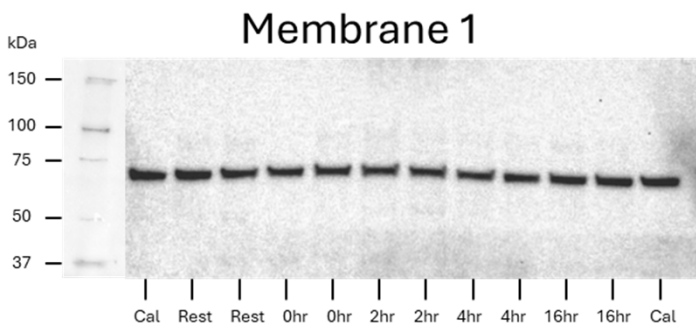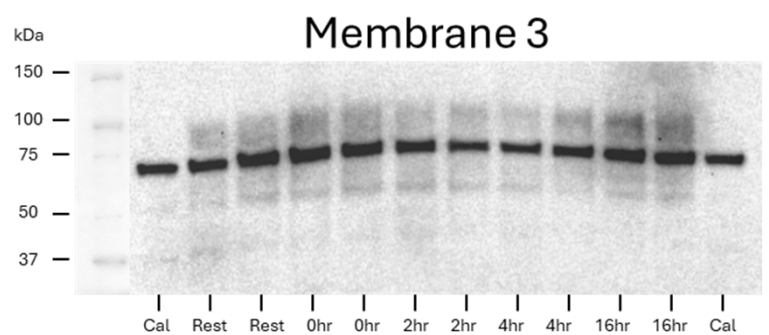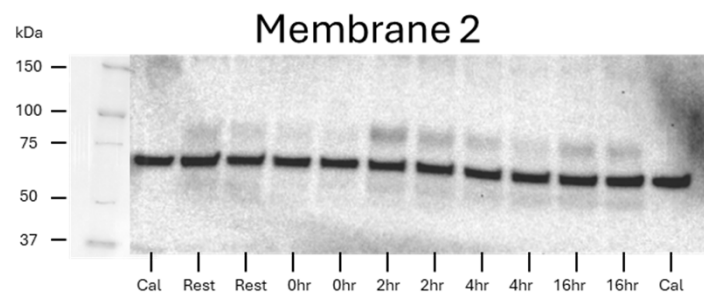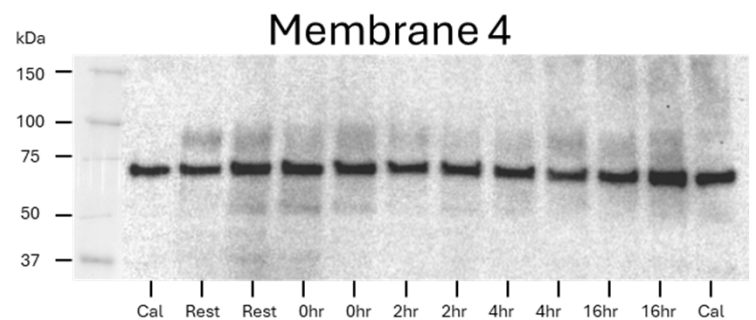

**Supplementary figure S3. STBD1 and GAA Immunoblots.** Cal, calibrator sample loaded on to each gel. Related to Figure 2

## GABARAPL1

### Membrane 1

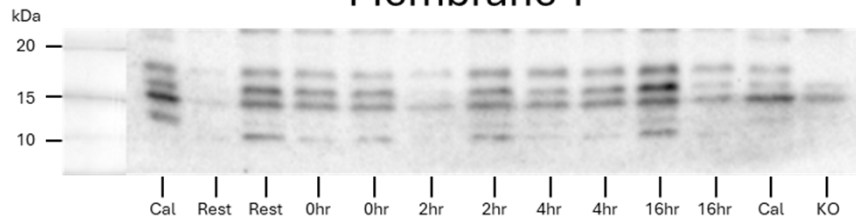

### Membrane 2

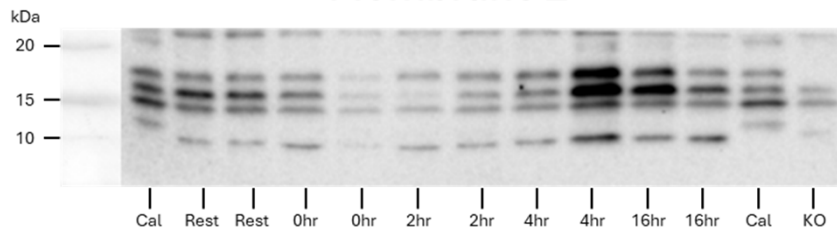

### Membrane 3

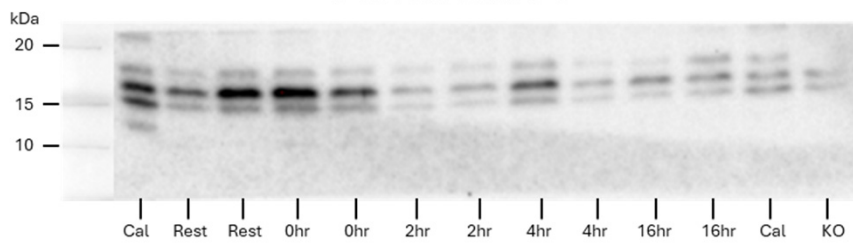

### Membrane 4

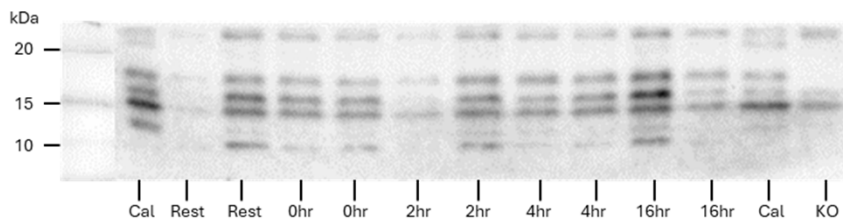

**Supplementary figure S4. GABARAPL1 Immunoblots.** Cal, calibrator sample loaded on to each gel. KO, GABARAPL1-KO mouse heart homogenate as a negative control. Related to Figure 2
